# Supplementary material
Source: publisher figshare collection journal article supplement (https://frontiersin.figshare.com/ndownloader/files/17200217)

**Figure S6. The comparisons of expression abundance of 8 randomly differentially expressed genes between qRT-PCR and RNA-Seq**

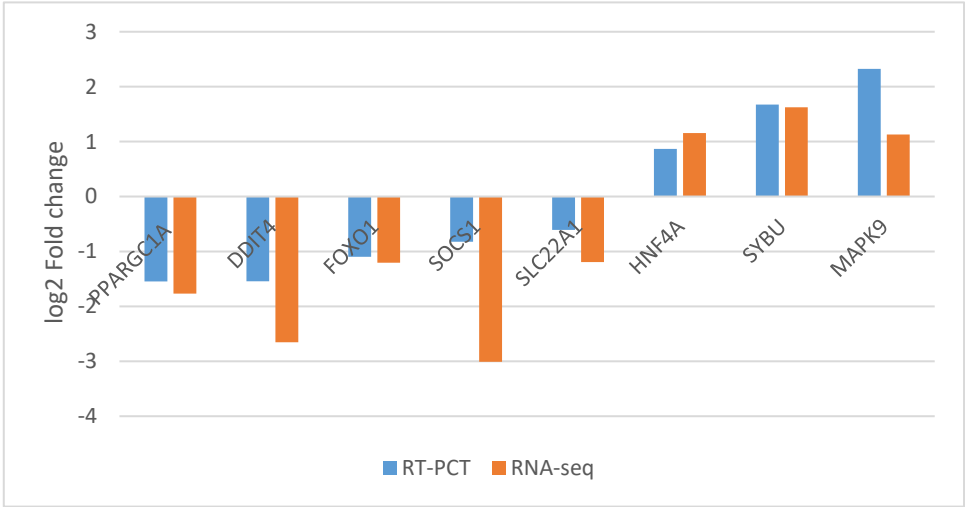

Supplement: Supplementary file [file 17200217]
